# Supplementary material
Source: Springer Nature journal article supplement (https://www.springermedizin.de/resource/supplementary/13002_2010_201_MOESM8_ESM.pdf/9627376)

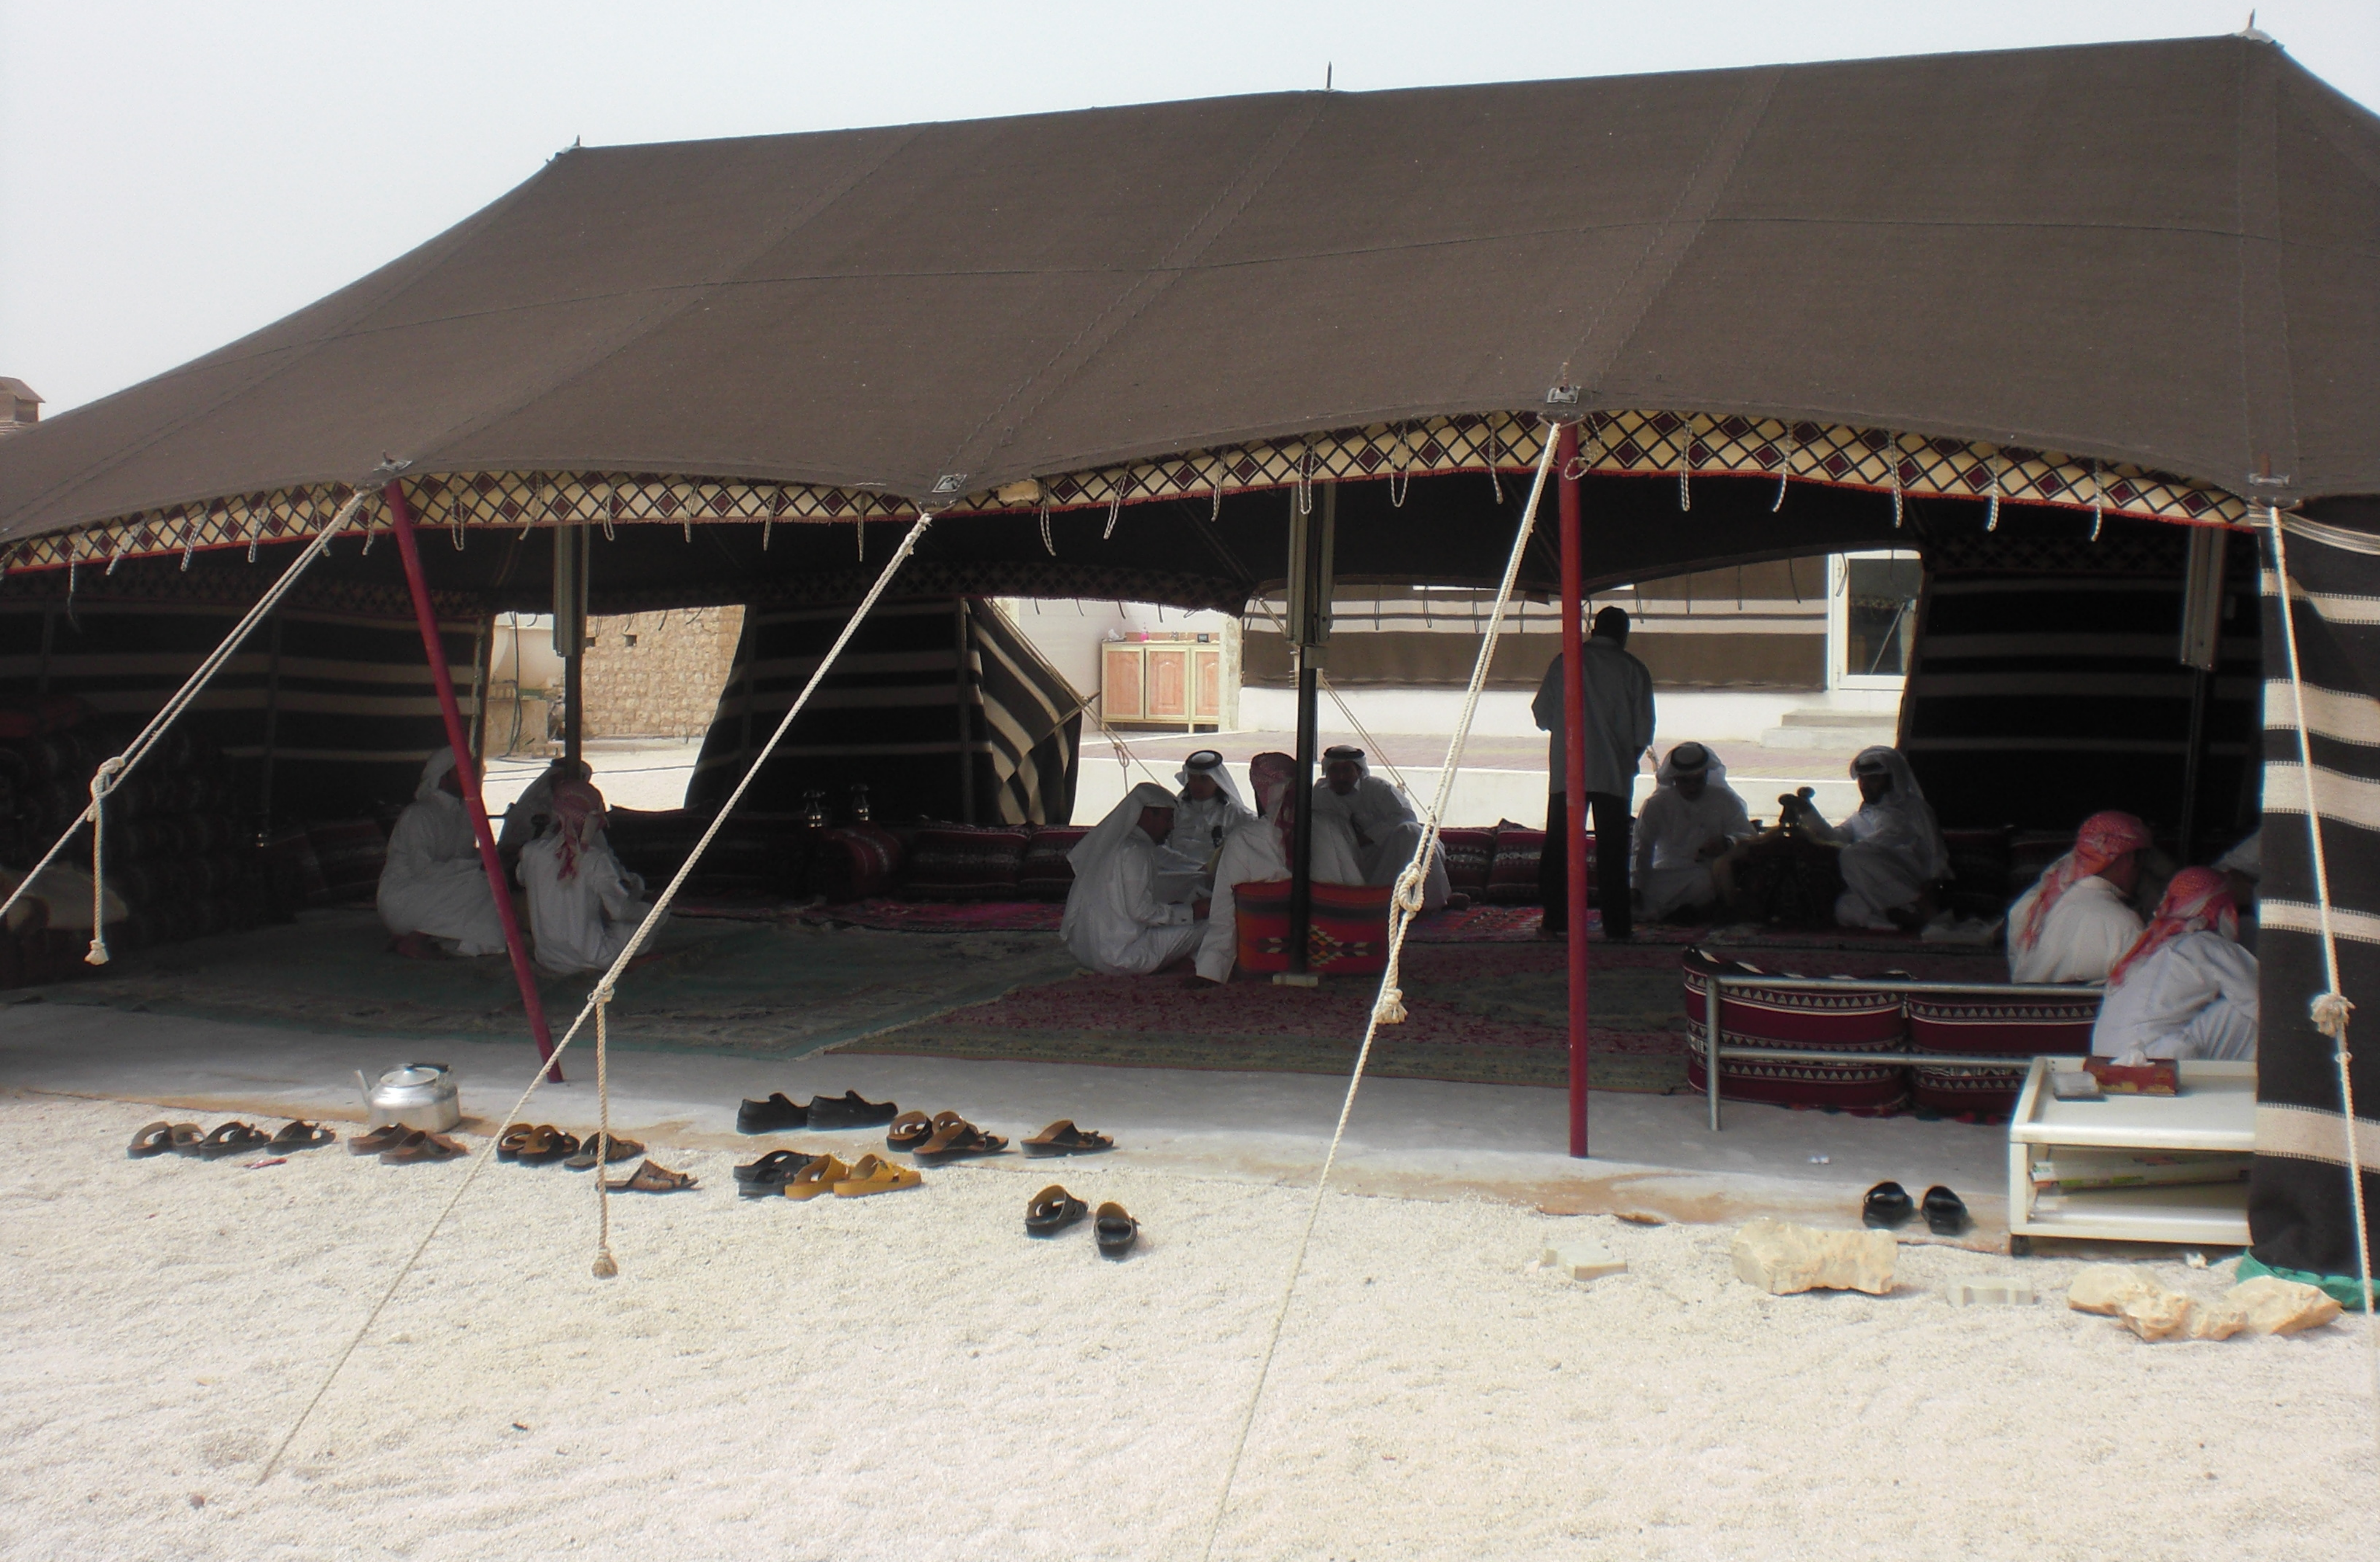

Supplement: MOESM8 [file 9627376]
